# Supplementary material for: Synthesis of sustainable eugenol/hydroxyethylmethacrylate-based polymers with antioxidant and antimicrobial properties
Source: Royal Society of Chemistry journal article supplement (doi:10.1039/d2py01183b), 2022-12-14
Supplement: d2py01183b1.pdf [file d2py01183b1.pdf]

## SUPPORTING INFORMATION

**Synthesis of sustainable eugenol/hydroxyethylmethacrylate-based polymers with antioxidant and antimicrobial properties**

Micol Di Consiglio<sup>1</sup>, Elisa Sturabotti<sup>1</sup>, Benedetta Brugnoli<sup>1</sup>, Antonella Piozzi<sup>1</sup>, Luisa Maria Migneco<sup>1,\*</sup>,  
Iolanda Francolini<sup>1,\*</sup>

<sup>1</sup> Department of Chemistry, Sapienza University of Rome, Italy

Correspondence to: Prof. Iolanda Francolini [iolanda.francolini@uniroma1.it](mailto:iolanda.francolini@uniroma1.it)

Prof. Luisa Maria Migneco [luisamaria.migneco@uniroma1.it](mailto:luisamaria.migneco@uniroma1.it)

Compound **1**:

$^1\text{H}$  NMR (400 MHz,  $\text{CDCl}_3$ )  $\delta$  6.92 – 6.62 (m, 3H, Ar), 5.96 (ddt,  $J = 16.8, 10.1, 6.7$  Hz, 1H, CH), 5.52 (s, 1H, OH), 5.17 – 4.95 (m, 2H,  $\text{CH}_2$ ), 3.88 (s, 3H,  $\text{OCH}_3$ ), 3.33 (d,  $J = 6.7$  Hz, 2H,  $\text{CH}_2$ ).

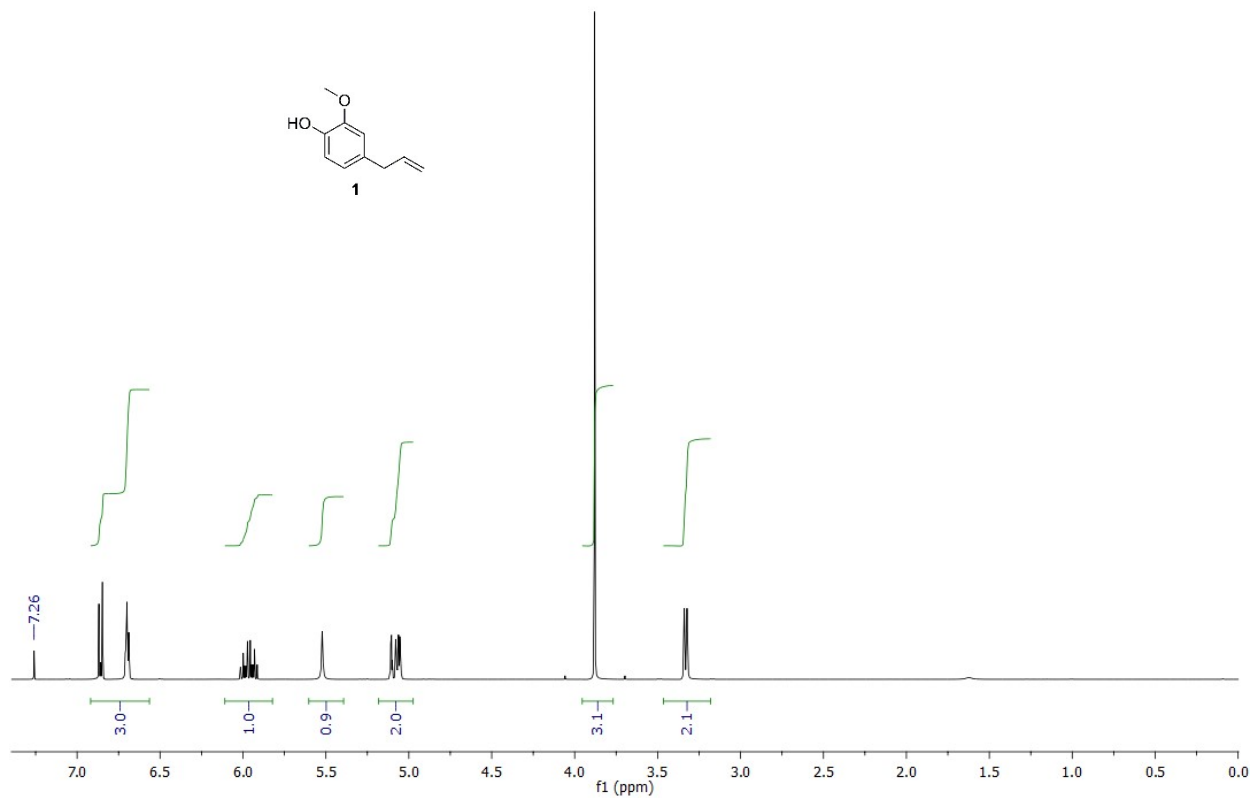

**Fig. S1:**  $^1\text{H}$  NMR spectrum of eugenol (**1**) in  $\text{CDCl}_3$ .

### Compound 2:

$^1\text{H NMR}$  (400 MHz,  $\text{CDCl}_3$ )  $\delta$  6.88 – 6.65 (m, 3H, Ar), 5.89 (s, 1H, OH), 3.84 (s, 3H,  $\text{OCH}_3$ ), 3.11 (tdd,  $J = 5.4, 3.9, 2.7$  Hz, 1H, CH), 2.77 (dd,  $J = 7.3, 3.2$  Hz, 2H,  $\text{CH}_2$ ), 2.52 (dd,  $J = 5.0, 2.7$  Hz, 2H,  $\text{CH}_2$ ).

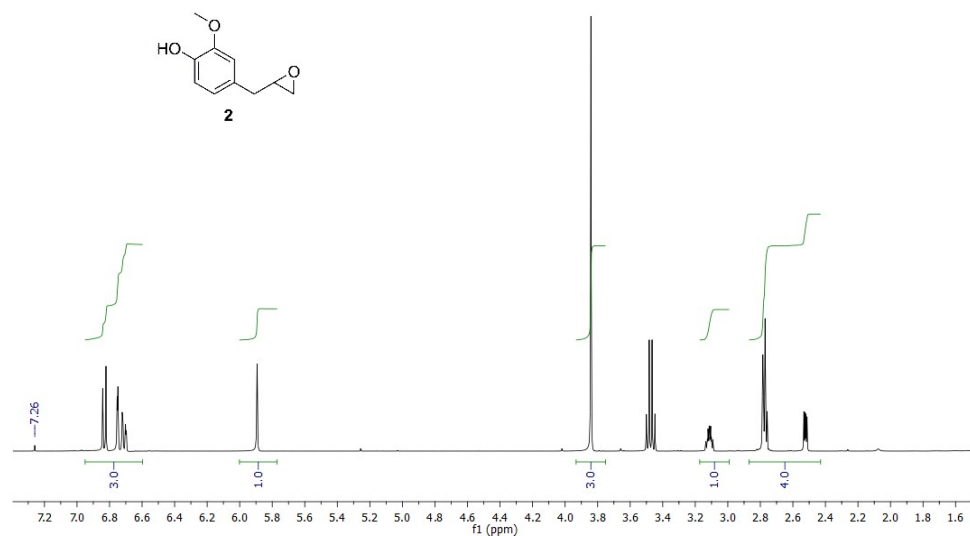

**Fig. S2:**  $^1\text{H NMR}$  spectrum of **2** in  $\text{CDCl}_3$ . Peak at 3.47 ppm is related to residual solvent (diethyl ether).

### Compound 3:

$^1\text{H NMR}$  (400 MHz,  $\text{CDCl}_3$ )  $\delta$  6.87 – 6.58 (m, 3H, Ar), 3.80 (s, 3H,  $\text{OCH}_3$ ), 3.18 – 3.06 (m, 1H, CHO), 2.84 – 2.71 (m, 3H), 2.54 (dd, 1H), 0.23 (s, 9H,  $(\text{CH}_3)_3$ ).

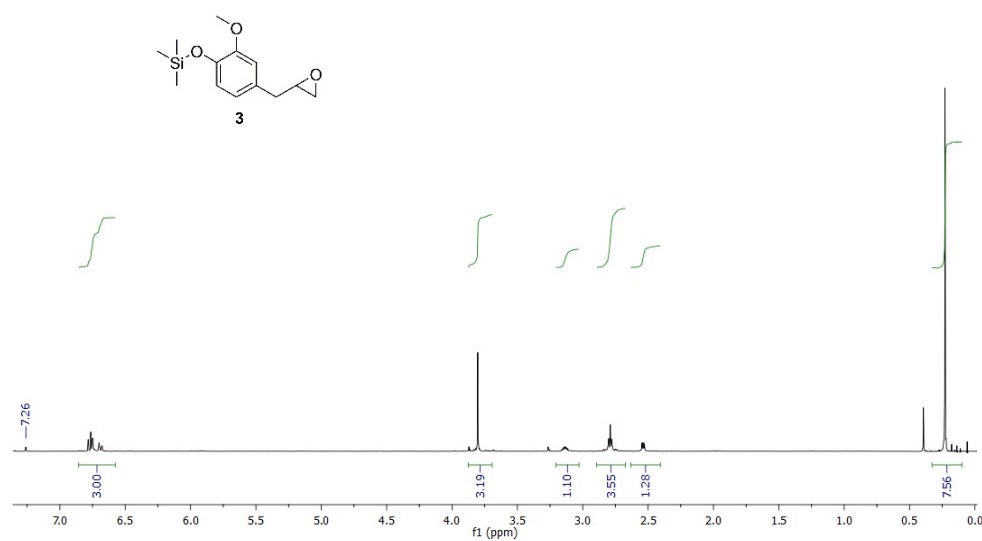

**Fig. S3:**  $^1\text{H NMR}$  of compound **3** in  $\text{CDCl}_3$ .

$^1\text{H}$  NMR (400 MHz,  $\text{CDCl}_3$ )  $\delta$  6.9 – 6.6 (m, ArEU), 6.1 (s, = $\text{CH}_2$ ), 5.6 (s, = $\text{CH}_2$ ), 4.2 (t,  $\text{OCH}_2\text{CH}_2\text{O}$ ), 3.9 (t,  $\text{OCH}_2\text{CH}_2\text{O}$ ), 3.8 ( $\text{OCH}_3$ ), 3.1 – 3.0 (m, CH), 2.9 – 2.4 (m, Ar $\text{CH}_2$  and  $\text{CH}_2$ ), 1.9 (s, = $\text{CH}_3$ ), 0.11 (m,  $\text{Si}(\text{CH}_3)_3$ ).

$^{13}\text{C}$  NMR (101 MHz,  $\text{CDCl}_3$ )  $\delta$  167.84 (C=O), 140.00 – 110.10 (7xC), 126.12 ( $\text{CH}_2$ ), 66.49 ( $\text{CH}_2$ ), 61.36 ( $\text{CH}_2$ ), 56.00 ( $\text{OCH}_3$ ), 52.81 (CH), 46.91 ( $\text{CH}_2$ ), 38.46 ( $\text{CH}_2$ ), 18.41 ( $\text{CH}_3$ ), -0.41 ( $\text{CH}_3$ ).

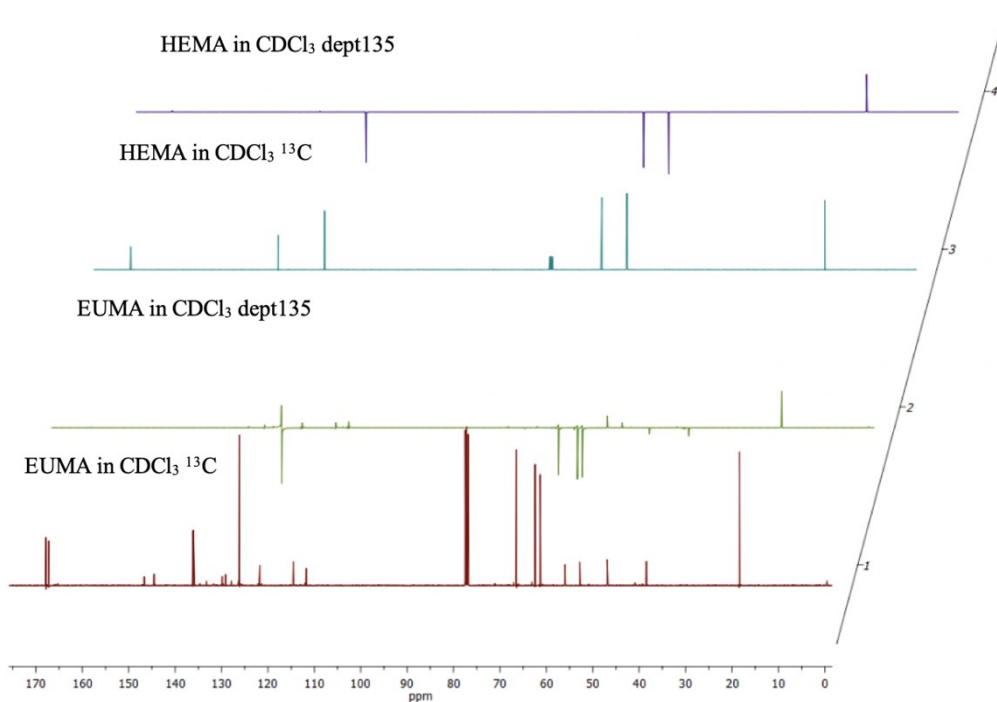

**Fig. S4:**  $^{13}\text{C}$  and dept135 NMR spectra of EUMA (compound **5**) compared to that of pristine HEMA in  $\text{CDCl}_3$ .

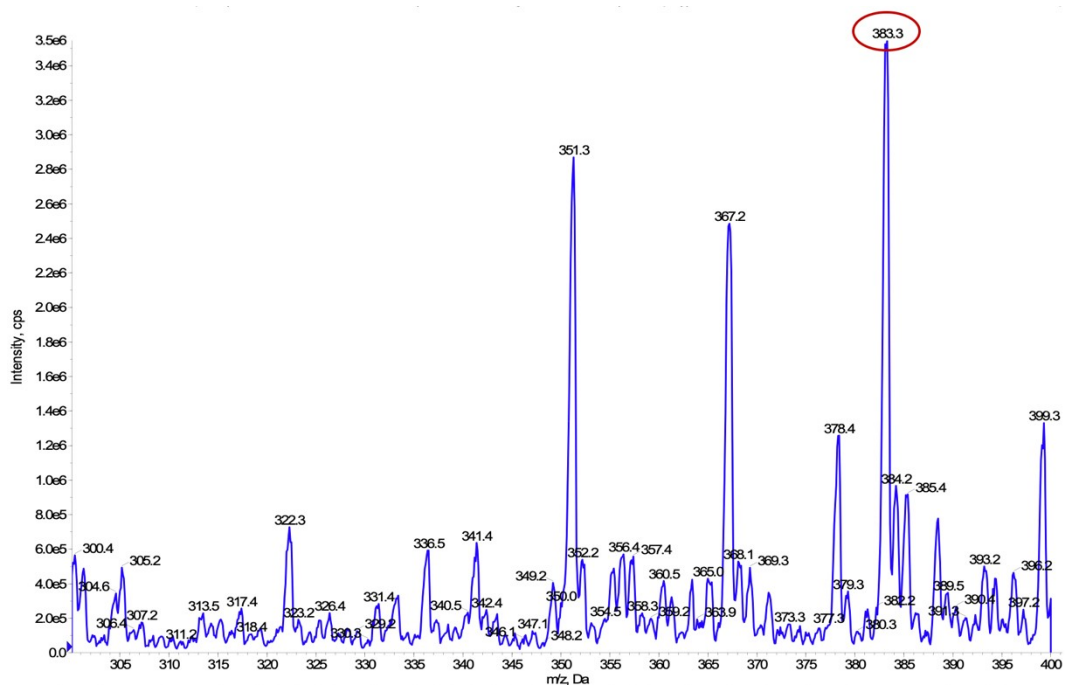

**Fig. S5:** Mass spectrometry spectrum of EUMA (compound 5).
